# Supplementary material for: Decreased Cerebral Amyloid-β Depositions in Patients With a Lifetime History of Major Depression With Suspected Non-Alzheimer Pathophysiology
Source: PubMed Central journal article supplement (PMC9204309; doi:10.3389/fnagi.2022.857940), 2022-05-26
Supplement: Data_Sheet_1.pdf [file Data_Sheet_1.pdf]

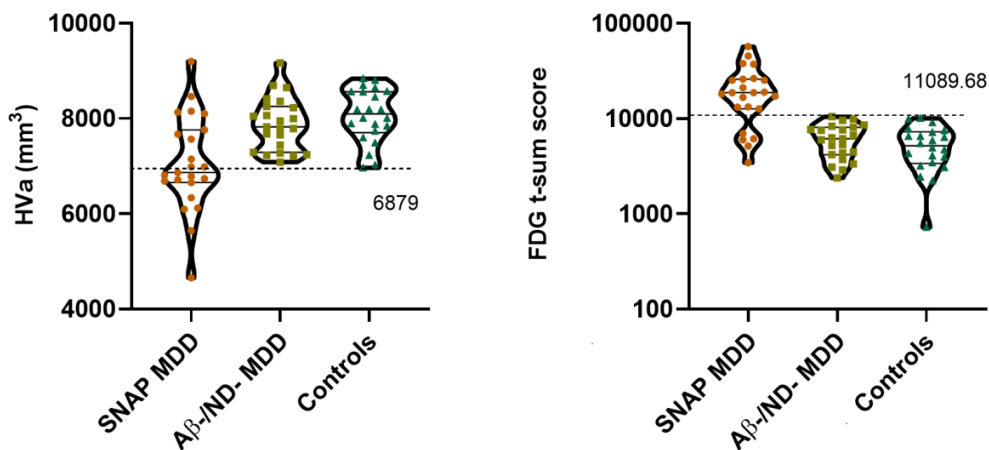

Supplementary Figure 1. Neurodegeneration biomarker distributions in the SNAP MDD ( $n=23$ ), A $\beta$ -/ND- MDD ( $n=23$ ) patients, and the A $\beta$ -/ND- control subjects ( $n=22$ ).

Supplementary Table 1. ROI group comparisons between the amyloid-negative MDD patients and control subjects.

| Characteristic      | A $\beta$ - MDD<br>$n = 46$ | Controls<br>$n = 22$ | p value |
|---------------------|-----------------------------|----------------------|---------|
| Frontal             | 1.11 $\pm$ 0.09             | 1.20 $\pm$ 0.09      | <0.001  |
| Anterior cingulate  | 1.21 $\pm$ 0.15             | 1.36 $\pm$ 0.12      | <0.001  |
| Posterior cingulate | 1.29 $\pm$ 0.13             | 1.39 $\pm$ 0.16      | 0.012   |
| Occipital           | 1.23 $\pm$ 0.09             | 1.29 $\pm$ 0.10      | 0.011   |
| Parietal            | 1.12 $\pm$ 0.12             | 1.15 $\pm$ 0.08      | 0.439   |
| Precuneus           | 1.09 $\pm$ 0.10             | 1.11 $\pm$ 0.08      | 0.586   |
| Temporal            | 1.05 $\pm$ 0.09             | 1.14 $\pm$ 0.10      | 0.003   |
| Global cortex       | 1.11 $\pm$ 0.08             | 1.19 $\pm$ 0.08      | 0.001   |

|                 |             |            |        |
|-----------------|-------------|------------|--------|
| Mesial temporal | 1.00 ± 0.09 | 1.08 ±0.06 | <0.001 |
| Hippocampus     | 1.05 ± 0.12 | 1.15 ±0.09 | 0.001  |
| Basal ganglia   | 1.10 ± 0.12 | 1.22 ±0.09 | <0.001 |

---

Abbreviations: ROI: region of interest; MDD: major depressive disorder.

p values denote the significance of differences between the MDD patients and the control subjects using the Mann-Whitney U test.

Supplementary Table 2. ROI group comparisons among the SNAP MDD, A $\beta$ -/ND- MDD, and control groups using non-PVC original data.

| Characteristic      | SNAP (A $\beta$ -/ND+) | A $\beta$ -/ND-      | Controls        | p value | Post-hoc analyses    |                         |                     |
|---------------------|------------------------|----------------------|-----------------|---------|----------------------|-------------------------|---------------------|
|                     | MDD<br><i>n</i> = 23   | MDD<br><i>n</i> = 23 | <i>n</i> = 22   |         | SNAP vs.<br>Controls | A-N-MDD vs.<br>Controls | SNAP vs.<br>A-N-MDD |
| Frontal             | 1.03 $\pm$ 0.10        | 1.09 $\pm$ 0.06      | 1.14 $\pm$ 0.08 | <0.001  | <0.001               | 0.156                   | 0.091               |
| Anterior cingulate  | 1.12 $\pm$ 0.15        | 1.22 $\pm$ 0.08      | 1.29 $\pm$ 0.09 | <0.001  | <0.001               | 0.094                   | 0.068               |
| Posterior cingulate | 1.22 $\pm$ 0.11        | 1.32 $\pm$ 0.11      | 1.35 $\pm$ 0.14 | 0.003   | 0.003                | >0.999                  | 0.032               |
| Occipital           | 1.16 $\pm$ 0.09        | 1.23 $\pm$ 0.07      | 1.24 $\pm$ 0.10 | 0.007   | 0.008                | >0.999                  | 0.061               |
| Parietal            | 1.03 $\pm$ 0.10        | 1.12 $\pm$ 0.10      | 1.08 $\pm$ 0.09 | 0.012   | 0.216                | 0.78                    | 0.009               |
| Precuneus           | 1.03 $\pm$ 0.10        | 1.06 $\pm$ 0.06      | 1.05 $\pm$ 0.08 | 0.701   | -                    | -                       | -                   |
| Temporal            | 0.99 $\pm$ 0.09        | 1.04 $\pm$ 0.06      | 1.09 $\pm$ 0.08 | 0.001   | 0.001                | 0.066                   | 0.43                |
| Global cortex       | 1.08 $\pm$ 0.09        | 1.15 $\pm$ 0.05      | 1.18 $\pm$ 0.08 | 0.001   | 0.001                | 0.543                   | 0.043               |
| Mesial temporal     | 0.96 $\pm$ 0.11        | 1.03 $\pm$ 0.07      | 1.07 $\pm$ 0.06 | <0.001  | <0.001               | 0.43                    | 0.035               |
| Hippocampus         | 1.00 $\pm$ 0.12        | 1.09 $\pm$ 0.09      | 1.14 $\pm$ 0.08 | <0.001  | <0.001               | 0.361                   | 0.047               |

|               |            |            |            |       |       |       |       |
|---------------|------------|------------|------------|-------|-------|-------|-------|
| Basal ganglia | 1.03 ±0.14 | 1.12 ±0.08 | 1.16 ±0.09 | 0.002 | 0.001 | 0.273 | 0.172 |
|---------------|------------|------------|------------|-------|-------|-------|-------|

---

Abbreviations: ROI: region of interest; SNAP: suspected non-Alzheimer disease pathophysiology; MDD: major depressive disorder; ND: neurodegeneration; PVC: partial volume correction.

p values denote the significance of differences among the SNAP MDD, Aβ-/ND- MDD and control groups using the Kruskal-Wallis test.

Supplementary Table 3. ROI group comparisons among the SNAP MDD, A $\beta$ -/ND- MDD, and control groups using ANCOVA.

| Characteristic      | SNAP (A $\beta$ -/ND+) | A $\beta$ -/ND-      | Controls        | p value | Post-hoc analyses |                   |                     |
|---------------------|------------------------|----------------------|-----------------|---------|-------------------|-------------------|---------------------|
|                     | MDD<br><i>n</i> = 23   | MDD<br><i>n</i> = 23 | <i>n</i> = 22   |         | SNAP vs.<br>NC    | A-N-MDD vs.<br>NC | SNAP vs.<br>A-N-MDD |
| Frontal             | 1.06 $\pm$ 0.10        | 1.15 $\pm$ 0.06      | 1.20 $\pm$ 0.09 | <0.001  | <0.001            | 0.302             | 0.003               |
| Anterior cingulate  | 1.14 $\pm$ 0.16        | 1.27 $\pm$ 0.11      | 1.36 $\pm$ 0.12 | <0.001  | <0.001            | 0.236             | 0.006               |
| Posterior cingulate | 1.23 $\pm$ 0.13        | 1.35 $\pm$ 0.11      | 1.39 $\pm$ 0.16 | 0.001   | 0.001             | >0.999            | 0.007               |
| Occipital           | 1.19 $\pm$ 0.10        | 1.27 $\pm$ 0.07      | 1.29 $\pm$ 0.10 | 0.001   | 0.003             | >0.999            | 0.007               |
| Parietal            | 1.08 $\pm$ 0.12        | 1.16 $\pm$ 0.11      | 1.15 $\pm$ 0.08 | 0.015   | 0.081             | >0.999            | 0.022               |
| Precuneus           | 1.06 $\pm$ 0.11        | 1.11 $\pm$ 0.07      | 1.11 $\pm$ 0.08 | 0.088   | -                 | -                 | -                   |
| Temporal            | 1.01 $\pm$ 0.09        | 1.09 $\pm$ 0.07      | 1.14 $\pm$ 0.10 | 0.001   | 0.001             | >0.999            | 0.011               |
| Global cortex       | 1.07 $\pm$ 0.09        | 1.15 $\pm$ 0.05      | 1.19 $\pm$ 0.08 | <0.001  | <0.001            | 0.74              | 0.002               |
| Mesial temporal     | 0.95 $\pm$ 0.09        | 1.05 $\pm$ 0.06      | 1.08 $\pm$ 0.06 | <0.001  | <0.001            | 0.739             | <0.001              |
| Hippocampus         | 1.00 $\pm$ 0.11        | 1.11 $\pm$ 0.09      | 1.15 $\pm$ 0.09 | <0.001  | <0.001            | >0.999            | 0.001               |

|               |            |            |            |        |        |       |       |
|---------------|------------|------------|------------|--------|--------|-------|-------|
| Basal ganglia | 1.05 ±0.12 | 1.16 ±0.08 | 1.22 ±0.09 | <0.001 | <0.001 | 0.336 | 0.002 |
|---------------|------------|------------|------------|--------|--------|-------|-------|

---

Abbreviations: ROI: region of interest; SNAP: suspected non-Alzheimer disease pathophysiology; MDD: major depressive disorder; ND: neurodegeneration; ANCOVA: analysis of covariance.

<sup>a</sup> ANCOVA was conducted to compare regional <sup>18</sup>F-florbetapir SUVRs among the three groups using age and years of education as covariates; pairwise differences among the adjusted means were further evaluated with Bonferroni correction.
